# Supplementary material for: Plasma Amino Acid Profile in Patients with Aortic Dissection
Source: PubMed Central journal article supplement (PMC5223271; doi:10.1038/srep40146), 2017-01-10
Supplement: srep40146-s1.pdf [file srep40146-s1.pdf]

# Plasma Amino Acid Profile in Patients with Aortic Dissection

*Linlin Wang<sup>†, #</sup>, Sha Liu<sup>‡, ^, #</sup>, Wengang Yang<sup>‡</sup>, Haitao Yu<sup>†</sup>, Li Zhang<sup>†</sup>, Ping Ma<sup>§</sup>, Peng  
Wu<sup>†</sup>, Xue Li<sup>†</sup>, Kenka Cho<sup>ξ</sup>, Song Xue<sup>‡, \*</sup>, Baohong Jiang<sup>†, \*</sup>*

<sup>†</sup>Shanghai Institute of Materia Medica, Chinese Academy of Sciences, Shanghai 201203, China

<sup>‡</sup>Department of Cardiovascular Surgery, Renji Hospital, Shanghai Jiaotong University School of Medicine, Shanghai 200127, China

<sup>^</sup>Covidien (Shanghai) Management Consulting Co., Ltd, Shanghai 200233, China

<sup>§</sup>The Second Artillery General Hospital PLA, Beijing 100088, China

<sup>ξ</sup>Takarazuka University of Medical and Health Care, Hanayashiki-Midorigaoka, Takarazuka-city 6660162, Japan

## Corresponding author

Prof. Song Xue, Dongfang Rd#1630, Shanghai, 200127, Chian. Fax: 86 21 58752345.

\*E-mail address: xuesong64@163.com

Prof. Baohong Jiang, Haike Rd#501, Shanghai 201203, China. Fax: 86 21 50272223.

\*E-mail address: jiangbh@simm.ac.cn.

<sup>#</sup>Authors contributed equally

Fig.S1 PCA scores plots of samples in different groups. A: CHD group (●) vs. Acute AD group (◆) ( $R^2X=81.6\%$ ,  $Q^2=47.9\%$ ); B: CHD group (●) vs. Chronic AD group (■) ( $R^2X=74.4\%$ ,  $Q^2=33.9\%$ ); C: Acute AD group (◆) vs. Chronic AD group (■) ( $R^2X=78.4\%$ ,  $Q^2=55.9\%$ ).

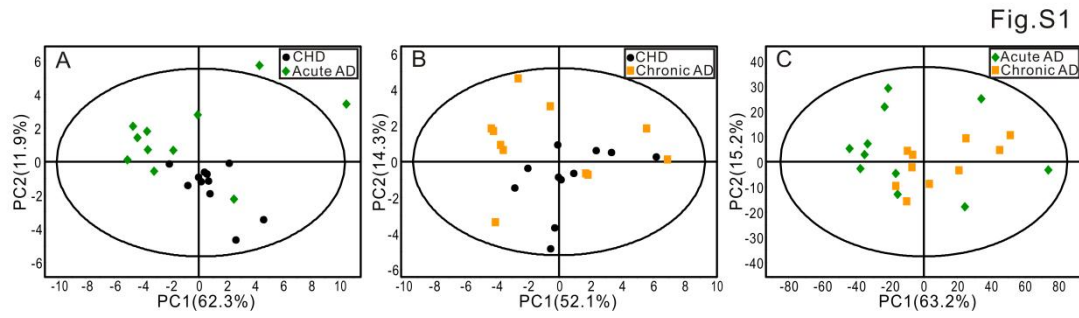

Fig.S2 Permutation test plots (200 permutations) for all the PLS-DA score plots. A: Acute AD vs. CHD. ( $R^2=0.0$ ,  $0.747$ ,  $Q^2=0.0$ ,  $-0.225$ ); B: Chronic AD vs. CHD ( $R^2=0.0$ ,  $0.664$ ,  $Q^2=0.0$ ,  $-0.089$ ); C: Acute AD vs. Chronic AD ( $R^2=0.0$ ,  $0.409$ ,  $Q^2=0.0$ ,  $-0.252$ ).

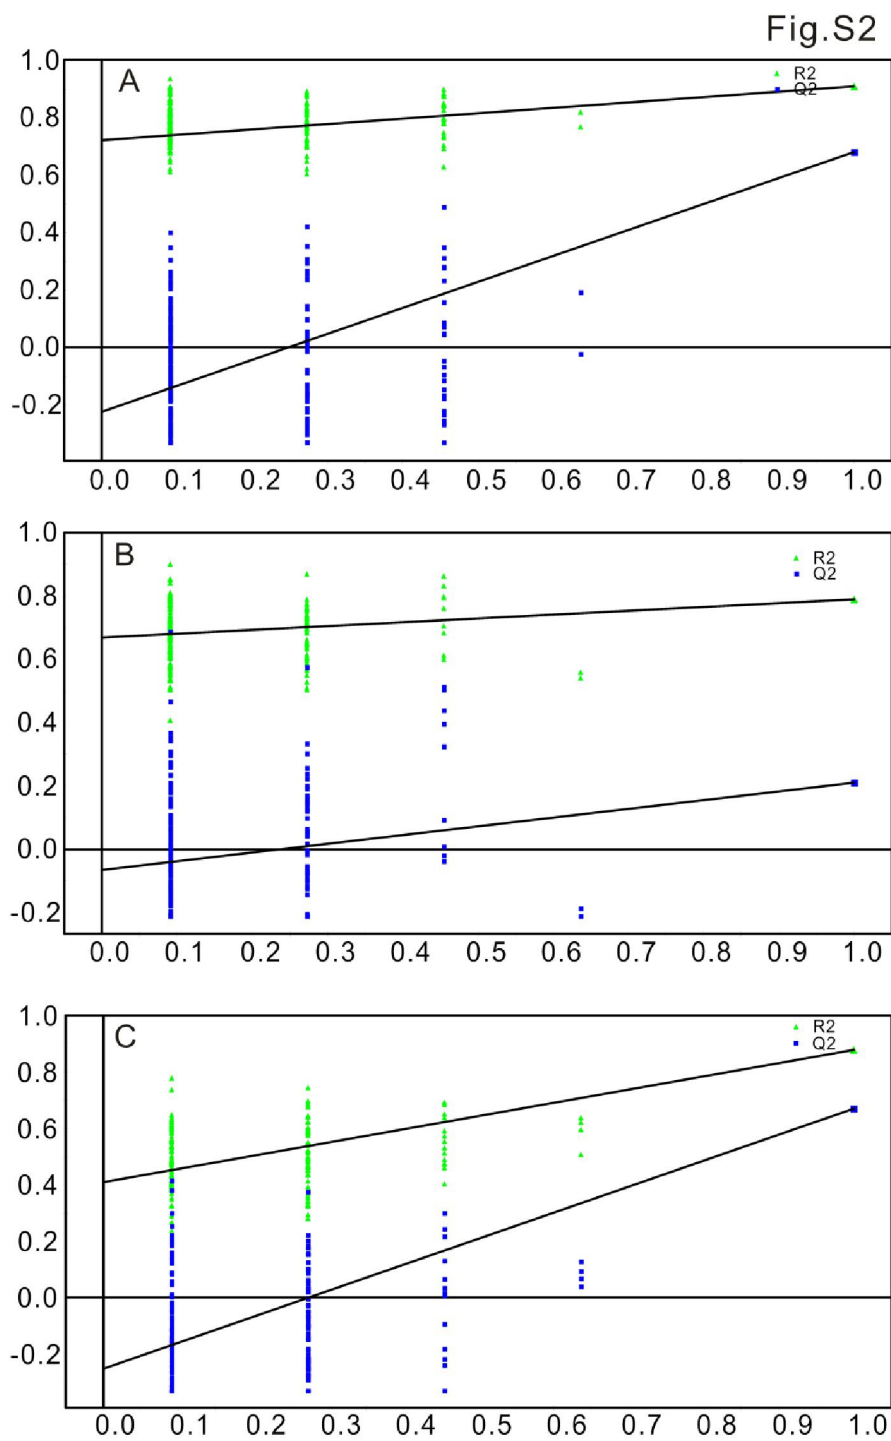

Table S1 Data for quality control samples.

| Amino acids | Average | RSD (%) |
|-------------|---------|---------|
| Arg         | 47.93   | 4.91    |
| His         | 65.73   | 6.52    |
| Ile         | 52.70   | 1.73    |
| Leu         | 120.92  | 2.46    |
| Lys         | 137.10  | 10.37   |
| Met         | 16.58   | 5.36    |
| Phe         | 49.44   | 2.84    |
| Thr         | 110.92  | 3.23    |
| Trp         | 35.96   | 1.82    |
| Val         | 233.33  | 1.83    |
| GABA        | 3.21    | 10.99   |
| Gly         | 305.17  | 5.32    |
| Ser         | 133.04  | 4.89    |
| Tau         | 71.99   | 9.78    |
| Tyr         | 43.16   | 2.97    |
| Aad         | 0.00    | 0.00    |
| Asn         | 42.77   | 3.71    |
| Asp         | 3.32    | 5.34    |
| Cit         | 36.46   | 5.83    |
| Glu         | 97.33   | 4.29    |
| Gln         | 504.99  | 2.15    |
| Orn         | 83.30   | 1.94    |
| Cys         | 16.03   | 7.57    |
| Cth         | 0.00    | 0.00    |
| Hcy         | 0.00    | 0.00    |
| Abu         | 20.65   | 7.66    |
| Ala         | 347.66  | 4.50    |
| Ans         | 0.00    | 0.00    |
| bAla        | 3.83    | 13.57   |
| bAib        | 1.18    | 14.61   |
| Car         | 0.00    | 0.00    |
| EtN         | 8.01    | 1.48    |
| Hyl         | 0.00    | 0.00    |
| Hyp         | 7.39    | 7.87    |
| 1MHis       | 6.10    | 0.31    |

|       |         |      |
|-------|---------|------|
| 3MHis | 2.45    | 6.08 |
| PEtN  | 0.00    | 0.00 |
| PSer  | 0.00    | 0.00 |
| Pro   | 186.11  | 8.79 |
| Sar   | 1.74    | 9.44 |
| Asa   | 0.00    | 0.00 |
| Hcit  | 0.00    | 0.00 |
| TOTAL | 2796.48 | 0.43 |

---
